# Supplementary material for: Pregnancy outcomes in women with Ebstein’s anomaly: data from the Registry of Pregnancy And Cardiac disease (ROPAC)
Source: HighWire-hosted journal article supplement (doi:10.1136/openhrt-2023-002406), 2023-08-01
Supplement: openhrt-2023-002406supp001_data_supplement.pdf [file openhrt-2023-002406supp001_data_supplement.pdf]

## Supplemental Material

### ROPAC Executive Committee

Roger Hall GB (Co-Chair), Jolien Roos-Hesselink NL (Co-Chair), Joerg Stein, AT, William Anthony Parsonage, AU, Werner Budts, BE, Julie De Backer, BE, Jasmin Grewal, CA, Ariane Marelli, CA, Harald Kaemmerer, DE, Guillaume Jondeau, FR, Mark Johnson, GB, Aldo P. Maggioni, IT, Luigi Tavazzi, IT, Ulf Thilen, SE, Uri Elkayam, US, Catherine Otto, US, Karen Sliwa, ZA.

### ROPAC Investigators

**ARGENTINA** - Buenos Aires: A. Aquieri, A. Saad, H. Ruda Vega, J. Hojman, J.M. Caparros, M. Vazquez Blanco **AUSTRALIA** - Elizabeth Vale: M. Arstall, C.M. Chung, G. Mahadavan, E. Aldridge, M. Wittwer, Y.Y. Chow, Herston: W.A. Parsonage, K. Lust, New Lambton Heights: N. Collins, G. Warner, R. Hatton, A. Gordon, E. Nyman **AUSTRIA** - Innsbruck: J. Stein, E. Donhauser, Vienna: H. Gabriel **AZERBAIJAN** - Baku: A. Bahshaliyev, F. Guliyev, I. Hasanova, T. Jahangirov, Z. Gasimov **BANGLADESH** - Dhaka: A. Salim, C.M. Ahmed, F. Begum, M.H. Hoque, M. Mahmood, M.N. Islam, P.P. Haque, S.K. Banerjee, T. Parveen **BELGIUM** - Brussels: M. Morissens, Gent: J. De Backer, L. Demulier, M. de Hosson, Leuven: W. Budts, M. Beckx **BOSNIA AND HERZEGOVINA** - Banja Luka: M. Kozic, M. Lovric, T. Kovacevic-Preradovic **BULGARIA** - Sofia: N. Chilingirova, P. Kratunkov **CANADA** - Edmonton: N. Wahab, S. McLean, Hamilton, Ontario: E. Gordon, L. Walter, Montreal: A. Marelli, A. R. Montesclaros **COLOMBIA** - Medellin: G. Monsalve, C. Rodriguez, F. Balthazar, V. Quintero, W. Palacio, L.A. Mejía Cadavid, E. Munoz Ortiz, F. Fortich Hoyos, E. Arevalo Guerrero, J. Gandara Ricardo, J. Velasquez Penagos **CZECH REPUBLIC** - Hradec Kralove: Z. Vavera, Prague: J. Popelova **DENMARK** - Copenhagen: N. Vejlstrop, L. Grønbeck, M. Johansen, A. Ersboll **EGYPT** - Alexandria: Y. Elrakshy, Assiut: K. Eltamawy, M. Gamal Abd-El Aziz, Benha: A. El Nagar, H. Ebaid, H. Abo Elenin, M. Saed, S. Farag, W. Makled, Cairo: K. Sorour, Z. Ashour, G. El-Sayed, M. Abdel Meguid Mahdy, Minia: N. Taha, A. Dardeer, M. Shabaan, Zagazig: A. Saad, M. Ali **FRANCE** - Nice: P. Moceri, Paris: G. Duthoit, M. Gouton, J. Nizard, L. Baris, S. Cohen, M. Ladouceur, D. Khimoud, B. Iung **GERMANY** - Berlin: F. Berger, A. Olsson, Bonn: U. Gembruch, W.M. Merz, E. Reinert, S. Clade, Y. Kliesch, Essen: C. Wald, Hamburg: C. Sinning, R. Kozlik-Feldmann, S. Blankenberg, E. Zengin-Sahm, G. Mueller, M. Hillebrand, P. Hauck, Y. von Kodolitsch, N.

Zarniko, Muenster: H. Baumgartner, R. Schmidt, A. Hellige, Munich: O. Tutarel, H. Kaemmerer, B. Kuschel, N. Nagdyman, Oldenburg: R. Motz **GEORGIA** - Tbilisi: D. Maisuradze **GREECE** - Athens: A. Frogoudaki, E. Iliodromitis, M. Anastasiou-Nana, Marousi, D. Triantafyllis, G. Bekiaris, Thessaloniki: H. Karvounis, G. Giannakoulas, D. Ntiloudi, S.A. Mouratoglou **HUNGARY** - Budapest: A. Temesvari, H. Balint, D. Kohalmi, B. Merkely, C. Liptai, Szeged: A. Nemes, T. Forster, A. Kalapos, K. Berek, K. Havasi, N. Ambrus **INDIA** - Karad: A. Shelke, R. Kawade, S. Patil **INDONESIA** - Bandung: E. Martanto, T.M. Aprami, A. Purnomowati, C.J. Cool, M. Hasan, R. Akbar, S. Hidayat, T.I. Dewi, W. Permadi, D.A. Soedarsono **IRAN** - Tehran: M.M. Ansari-Ramandi, N. Samiei, A. Tabib, F. Kashfi, S. Ansari-Ramandi, S. Rezaei **IRAQ** - Baghdad: H. Ali Farhan, A. Al-Hussein, G. Al-Saedi, G. Mahmood, I.F. Yaseen, L. Al-Yousuf, M. AlBayati, S. Mahmood, S. Raheem, T. AlHaidari, Z. Dakhil **IRELAND** - Dublin: P. Thornton, J. Donnelly, M. Bowen **ISRAEL** - Beer Yakov: A. Blatt, G. Elbaz-Greener, Hadera: A. Shotan, Haifa: S. Yalonetsky, Rehovot: S. Goland, M. Biener **ITALY** - Bologna: G. Egidy Assenza, M. Bonvicini, A. Donti, A. Bulgarelli, D. Prandstraller, Bolzano: C. Romeo, R. Crepez, Brescia: E. Sciatti, M. Metra, R. Orabona, Massa: L. Ait Ali, P. Festa, Milan: V. Fesslova, C. Bonanomi, M. Calcagnino, F. Lombardi, A.M. Colli, M.W. Ossola, C. Gobbi, E. Gherbesi, L. Tondi, M. Schiavone, M. Squillace, Palermo: M.G. Carmina, Torino: A. Maina, C. Macchi, E. Gollo, F.M. Comoglio, N. Montali, P. Re, R. Bordese, T. Todros, V. Donvito, W. Grosso Marra, Trieste: G. Sinagra, B. D'Agata Mottolese, M. Bobbo, V. Gesuete, S. Rakar, F. Ramani **JAPAN** - Chiba: K. Niwa **KAZAKHSTAN** - Almaty: D. Mekebekova, A. Mussagaliyeva, T. Lee **KYRGYZSTAN** - Bishkek: E. Mirrakhimov, S. Abilova, E. Bektasheva, K. Neronova, O. Lunegova **LITHUANIA** - Kaunas: R. Žaliūnas, R. Jonkaitienė, J. Petrauskaitė, Vilnius: A. Laucevicius, D. Jancauskaite, L. Lauciuvienė, L. Gumbiene, L. Lankutiene, S. Glaveckaite, M. Laukyte, S. Solovjova, V. Rudiene **MALAYSIA** - Kuala Lumpur: K.H. Chee, C.C-W. Yim, H.L. Ang, R. Kuppusamy, T. Watson **MALTA** - Birkirkara: M. Caruana **NORWAY** - Oslo: M-E. Estensen **PAKISTAN** - Rawalpindi: M.G.A. Mahmood Kayani, R. Munir **POLAND** - Bialystok: A. Tomaszuk-Kazberuk, B. Sobkowicz, J. Przepiesc, Krakow: A. Lesniak-Sobelga, L. Tomkiewicz-Pajak, M. Komar, M. Olszowska, P. Podolec, S. Wisniowska-Smialek, Lodz: M. Lelonek, U. Faflik, A. Cichocka-Radwan, Poznan: K. Plaskota, O. Trojnariska **PORTUGAL** - Coimbra: N. Guerra, Lisboa: L. de Sousa, Porto: C. Cruz, V. Ribeiro **REPUBLIC OF MACEDONIA** - Skopje: S. Jovanova **ROMANIA** - Bucharest: V. Petrescu, R. Jurcut, C. Gingham, I. Mircea Coman, M. Musteata **RUSSIA** - Belgorod: O. Osipova, T. Golivets, I. Khamnagadaev, O. Golovchenko, A. Nagibina, I. Ropatko, Izhevsk: I.R. Gaisin, L. Valeryevna Shilina, Moscow: N. Sharashkina, Saint-

Petersburg: E. Shlyakhto, O. Irtyuga, O. Moiseeva, E. Karelkina, I. Zazerskaya, A. Kozlenok, I. Sukhova **SERBIA**  
- Belgrade: L. Jovovic **SLOVENIA** - Ljubljana: K. Prokšelj, M. Koželj **SOMALILAND** - Hargeisa: A.O. Askar,  
A.A. Abdilaahi, M.H. Mohamed, A.M. Dirir **SOUTH AFRICA** - Cape Town: K. Sliwa, Houghton: P. Manga  
**SPAIN** - Barcelona: A. Pijuan-Domenech, L. Galian-Gay, P. Tornos, M.T. Subirana, M. T. Subirana, Bilbao: N.  
Murga, Madrid: J. M. Oliver, B. Garcia-Aranda Dominguez, I. Hernandez Gonzalez, J.F. Delgado Jimenez, P.  
Escribano Subias **SUDAN** - Khartoum: A. Elbushi, A. Suliman, K. Jazzar, M. Murtada, N. Ahamed  
**SWEDEN** - Göteborg: M. Dellborg, E. Furenas, M. Jinesjo, K. Skoglund, P. Eriksson, T. Gilljam, Lund: U. Thilen  
**SWITZERLAND** - Basel: D. Tobler, Bern: K. Wustmann, F. Schwitz, M. Schwerzmann, Lausanne: T. Rutz, J.  
Bouchardy, Zurich: M. Greutmann, B.M. Santos Lopes, L. Meier, M. Arrigo **THE NETHERLANDS**  
- Amsterdam: K. de Boer, T. Konings, Enschede: E. Wajon, L.J. Wagenaar, Geldrop: P. Polak, Groningen: E.PG.  
Pieper, Rotterdam: J. Roos-Hesselink, L. Baris, I. van Hagen, H. Duvekot, J.M.J. Cornette, The Hague: C. De  
Groot, Utrecht: C. van Oppen **TURKEY** - Istanbul: L. Sarac, O. Batukan Esen, S. Catirli Enar **UGANDA**  
- Kampala: C. Mondo, P. Ingabire, B. Nalwanga, T. Semu **UNITED ARAB EMIRATES** - Abu Dhabi: B.T. Salih,  
W.A.R. Almahmeed, S. Wani, F.S. Mohamed Farook, Al Ain, F. Gerges, A.M. Komaranchath, F. Al  
bakshi, Dubai: A. Al Mulla, A.H. Yusufali, E.I. Al Hatou, N. Bazargani, F. Hussain **UNITED KINGDOM**  
- Birmingham: L. Hudsmith, P. Thompson, S. Thorne, S. Bowater, Buckinghamshire: A. Money-Kyrle, P. Clifford,  
P. Ramrakha, S. Firoozan, J. Chaplin, N. Bowers, Coventry: D. Adamson, London: F. Schroeder, R. Wendler, S.  
Hammond, P. Nihoyannopoulos, Norwich Norfolk: R. Hall, L. Freeman, Southampton: G. Veldtman, J. Kerr, L.  
Tellett **UNITED STATES** - Boston: N. Scott, A.B. Bhatt, D. DeFaria Yeh, M.A. Youniss, M. Wood, A.A. Sarma,  
S. Tsiaras, A. Stefanescu, J.M. Duran, L. Stone, Cleveland: D.S. Majdalany, J. Chapa, Detroit: K. Chintala, P. Gupta  
, Hershey, PA: J. Botti, J. Ting, W. R. Davidson, Lexington, Kentucky: G. Wells, D. Sparks, Mineola, NY: V.  
Paruchuri, K. Marzo, D. Patel, Minneapolis: W. Wagner, S.N. Ahanya, L. Colicchia, T. Jentink, K. Han, M.  
Loichinger, M. Parker, W. Wagner, C. Longtin, Omaha: A. Yetman, K. Erickson, J. Cramer, S. Tsai, B. Fletcher, S.  
Warta, Phoenix: C. Cohen, C. Lindblade, R. Puntel, K. Nagaran, N. Croft, Seattle: M. Gurvitz, C. Otto, Stanford,  
CA: C. Talluto, D. Murphy, M. G. Perlroth.
